# Supplementary material for: Self-assembly behavior and sustained drug release properties of amphiphilic poly(amino acid)s
Source: Royal Society of Chemistry journal article supplement (doi:10.1039/d2nj04480c), 2022-01-01
Supplement: d2nj04480c1.pdf [file d2nj04480c1.pdf]

## Self-assembly behavior and sustained drug release properties of amphiphilic poly(amino acid)s

### Support information

#### S1. Chemical bonding of model drugs to polymers

A certain amount of polymer was dissolved in DMF, and DOX solution was slowly added to the system by drops. Under continuous agitation, the carbon group would be reacted with the amino group to form imine bond. The reaction process was shown in Fig.S1.

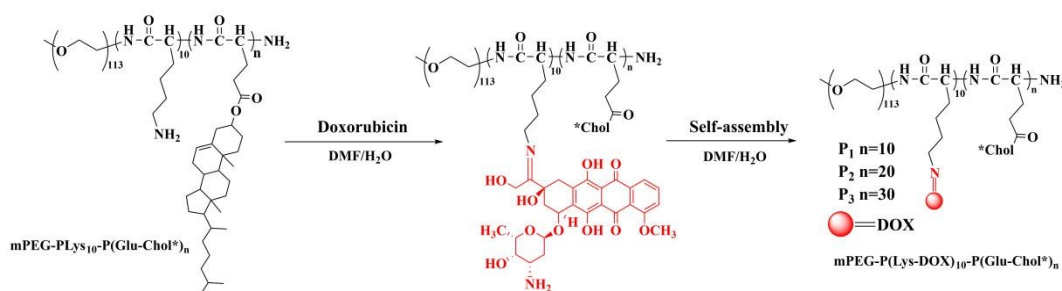

Fig.S1. The formation principle of Schiff base

#### S2. DLS of polymers after self-assembly

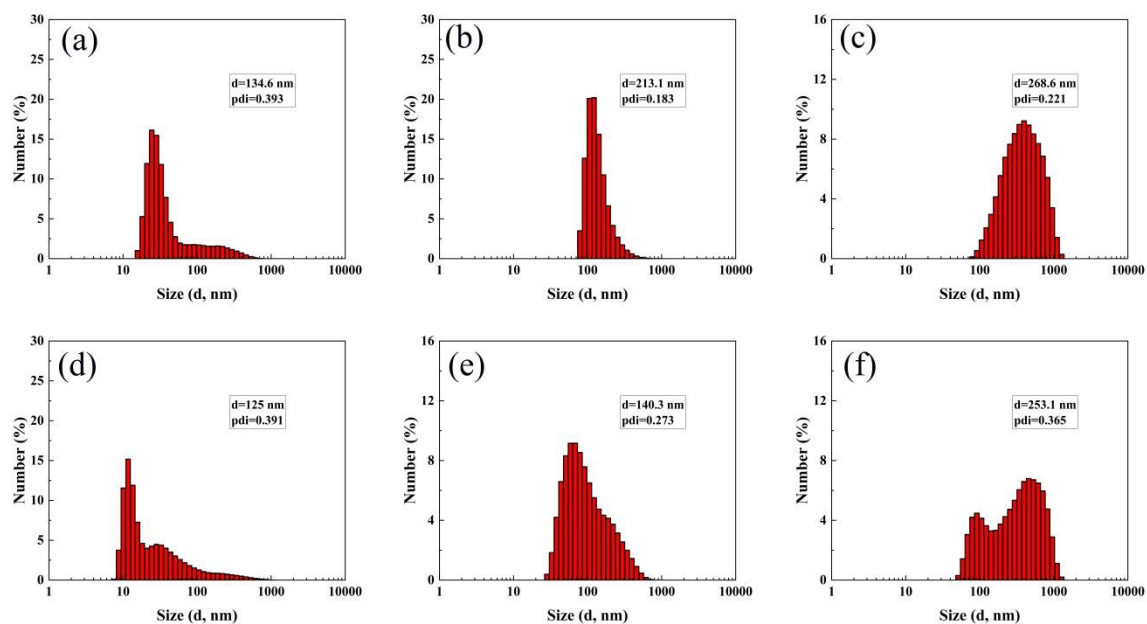

Fig.S2. DLS of self-assembly of polymers (a) P1, pH=5.0, (b) P2, pH=5.0, (c) P3, pH=5.0, (d) P1, pH=7.4, (e) P2, pH=7.4, (f) P3, pH=7.4

### S3. Drug release kinetics of nanoparticles

Table S1. Zero order kinetic fitting of drug release behavior at different pH, T=37 °C

|          | pH  | Fitting curve equation | R <sup>2</sup> |
|----------|-----|------------------------|----------------|
| DOX-P1-M | 5.0 | Mt = 0.7180 t + 32.94  | 0.7325         |
|          | 6.2 | Mt = 0.4563 t + 29.02  | 0.7042         |
|          | 7.4 | Mt = 0.1796 t + 24.81  | 0.4679         |
| DOX-P2-M | 5.0 | Mt = 0.7606 t + 31.02  | 0.7133         |
|          | 6.2 | Mt = 0.3800 t + 24.75  | 0.6602         |
|          | 7.4 | Mt = 0.2754 t + 21.67  | 0.6123         |
| DOX-P3-M | 5.0 | Mt = 0.7692 t + 31.51  | 0.7160         |
|          | 6.2 | Mt = 0.5393 t + 26.16  | 0.7508         |
|          | 7.4 | Mt = 0.2136 t + 22.62  | 0.5100         |

Table S2. Zero order kinetic fitting of drug release behavior at different temperature, pH=7.4.

|          | T     | Fitting curve equation | R <sup>2</sup> |
|----------|-------|------------------------|----------------|
| DOX-P1-M | 25 °C | Mt = 0.1896 t + 18.25  | 0.6287         |
|          | 37 °C | Mt = 0.1796 t + 24.81  | 0.4679         |
|          | 45 °C | Mt = 0.3223 t + 26.38  | 0.6858         |
| DOX-P2-M | 25 °C | Mt = 0.2046 t + 17.45  | 0.6882         |
|          | 37 °C | Mt = 0.2754 t + 21.67  | 0.6123         |
|          | 45 °C | Mt = 0.3827 t + 25.34  | 0.6175         |
| DOX-P3-M | 25 °C | Mt = 0.1529 t + 17.61  | 0.5873         |
|          | 37 °C | Mt = 0.2136 t + 22.62  | 0.5100         |
|          | 45 °C | Mt = 0.2701 t + 34.19  | 0.4684         |

Table S3. First order kinetic fitting of drug release behavior at different pH, T=37 °C

|          | pH  | Fitting curve equation         | R <sup>2</sup> |
|----------|-----|--------------------------------|----------------|
| DOX-P1-M | 5.0 | ln (100-Mt) = -0.0184 t + 4.21 | 0.8902         |
|          | 6.2 | ln (100-Mt) = -0.0082 t + 4.25 | 0.7822         |
|          | 7.4 | ln (100-Mt) = -0.0025 t + 4.31 | 0.5019         |
| DOX-P2-M | 5.0 | ln (100-Mt) = -0.0191 t + 4.23 | 0.8439         |
|          | 6.2 | ln (100-Mt) = -0.0059 t + 4.31 | 0.7247         |
|          | 7.4 | ln (100-Mt) = -0.0039 t + 4.35 | 0.6573         |
| DOX-P3-M | 5.0 | ln (100-Mt) = -0.0199 t + 4.23 | 0.8695         |
|          | 6.2 | ln (100-Mt) = -0.0098 t + 4.30 | 0.8296         |
|          | 7.4 | ln (100-Mt) = -0.0029 t + 4.34 | 0.5429         |

Table S4. First order kinetic fitting of drug release behavior at different temperature, pH=7.4.

|          | <b>T</b> | <b>Fitting curve equation</b>     | <b>R<sup>2</sup></b> |
|----------|----------|-----------------------------------|----------------------|
| DOX-P1-M | 25 °C    | $\ln (100-Mt) = -0.0024 t + 4.40$ | 0.6640               |
|          | 37 °C    | $\ln (100-Mt) = -0.0025 t + 4.31$ | 0.5019               |
|          | 45 °C    | $\ln (100-Mt) = -0.0051 t + 4.29$ | 0.7505               |
| DOX-P2-M | 25 °C    | $\ln (100-Mt) = -0.0026 t + 4.41$ | 0.7202               |
|          | 37 °C    | $\ln (100-Mt) = -0.0039 t + 4.35$ | 0.6573               |
|          | 45 °C    | $\ln (100-Mt) = -0.0061 t + 4.31$ | 0.6980               |
| DOX-P3-M | 25 °C    | $\ln (100-Mt) = -0.0019 t + 4.41$ | 0.6188               |
|          | 37 °C    | $\ln (100-Mt) = -0.0029 t + 4.34$ | 0.5429               |
|          | 45 °C    | $\ln (100-Mt) = -0.0045 t + 4.17$ | 0.5378               |

Table S5. Higuchi model fitting of drug release behavior at different pH, T=37 °C

|          | <b>pH</b> | <b>Fitting curve equation</b> | <b>R<sup>2</sup></b> |
|----------|-----------|-------------------------------|----------------------|
| DOX-P1-M | 5.0       | $Mt = 8.3566 t^{1/2} + 14.52$ | 0.9022               |
|          | 6.2       | $Mt = 5.3523 t^{1/2} + 17.11$ | 0.8833               |
|          | 7.4       | $Mt = 2.2339 t^{1/2} + 19.48$ | 0.6783               |
| DOX-P2-M | 5.0       | $Mt = 8.8983 t^{1/2} + 11.27$ | 0.8896               |
|          | 6.2       | $Mt = 4.5036 t^{1/2} + 14.59$ | 0.8486               |
|          | 7.4       | $Mt = 3.3064 t^{1/2} + 14.11$ | 0.8111               |
| DOX-P3-M | 5.0       | $Mt = 8.9925 t^{1/2} + 11.58$ | 0.8909               |
|          | 6.2       | $Mt = 6.2413 t^{1/2} + 12.51$ | 0.9128               |
|          | 7.4       | $Mt = 2.6345 t^{1/2} + 16.40$ | 0.7229               |

Table S6. Higuchi model fitting of drug release behavior at different temperature, pH=7.4.

|          | <b>T</b> | <b>Fitting curve equation</b> | <b>R<sup>2</sup></b> |
|----------|----------|-------------------------------|----------------------|
| DOX-P1-M | 25 °C    | $Mt = 2.2598 t^{1/2} + 13.12$ | 0.8187               |
|          | 37 °C    | $Mt = 2.2339 t^{1/2} + 19.48$ | 0.6783               |
|          | 45 °C    | $Mt = 3.7882 t^{1/2} + 17.93$ | 0.8641               |
| DOX-P2-M | 25 °C    | $Mt = 2.4047 t^{1/2} + 12.09$ | 0.8671               |
|          | 37 °C    | $Mt = 3.3064 t^{1/2} + 14.11$ | 0.8111               |
|          | 45 °C    | $Mt = 4.5754 t^{1/2} + 14.92$ | 0.8108               |
| DOX-P3-M | 25 °C    | $Mt = 1.8348 t^{1/2} + 13.40$ | 0.7788               |
|          | 37 °C    | $Mt = 2.6345 t^{1/2} + 16.40$ | 0.7229               |
|          | 45 °C    | $Mt = 3.3383 t^{1/2} + 26.28$ | 0.6695               |
